# Supplementary material for: Molecular Genetic Analysis of Human Endometrial Mesenchymal Stem Cells That Survived Sublethal Heat Shock
Source: PubMed Central journal article supplement (PMC5742502; doi:10.1155/2017/2362630), 2017-12-10
Supplement: 2362630.f1.pdf [file 2362630.f1.pdf]

Supplementary Table 1: Gene modules enriching for genes that are significantly induced or repressed in SHS-survived vs control eMSC

| Pathway or GO ID                | Pathway or GO category name                                                                                                                                      | F_D*  | №** | P-value  | q-value |
|---------------------------------|------------------------------------------------------------------------------------------------------------------------------------------------------------------|-------|-----|----------|---------|
| <b>Cell Cycle</b>               |                                                                                                                                                                  |       |     |          |         |
| REACT_6954                      | Activation of APC/C and APC/C:Cdc20 mediated degradation of mitotic proteins                                                                                     | 2.1   | 55  | 2.00E-04 | 0.01671 |
| KEGG_hsa03030                   | DNA replication                                                                                                                                                  | 2.992 | 21  | 1.60E-03 | 0.06307 |
| REACT_2014                      | Synthesis of DNA                                                                                                                                                 | 1.651 | 70  | 4.00E-04 | 0.00879 |
| REACT_150471                    | Separation of Sister Chromatids                                                                                                                                  | 1.623 | 103 | 2.00E-04 | 0.01671 |
| REACT_6781                      | APC/C:Cdc20 mediated degradation of mitotic proteins<br>APC/C:Cdh1 mediated degradation of Cdc20 and other APC/C:Cdh1 targeted proteins in late mitosis/early G1 | 2.058 | 54  | 5.00E-04 | 0.03165 |
| REACT_6761                      |                                                                                                                                                                  | 1.957 | 54  | 7.00E-04 | 0.0375  |
| 138077_PID                      | Polo-like kinase signaling events in the cell cycle                                                                                                              | 3.279 | 3   | 1.40E-03 | 0.03944 |
| REACT_899                       | S Phase                                                                                                                                                          | 1.425 | 82  | 4.00E-03 | 0.09831 |
| REACT_6785                      | Autodegradation of Cdh1 by Cdh1:APC/C                                                                                                                            | 1.852 | 48  | 4.50E-03 | 0.10331 |
| 138051_PID                      | EPO signaling pathway                                                                                                                                            | 3.198 | 14  | 6.90E-03 | 0.12427 |
| KEGG_M00693                     | Cell cycle - G2/M transition                                                                                                                                     | 4.152 | 5   | 7.40E-03 | 0.12883 |
| REACT_6820                      | APC/C:Cdc20 mediated degradation of Cyclin B                                                                                                                     | 3.125 | 14  | 8.20E-03 | 0.13396 |
| REACT_829                       | Regulation of DNA replication                                                                                                                                    | 1.492 | 58  | 9.50E-03 | 0.14487 |
| REACT_22172                     | Chromosome Maintenance                                                                                                                                           | 2.085 | 30  | 1.00E-02 | 0.14922 |
| GO:0090068                      | positive regulation of cell cycle process                                                                                                                        | 1.003 | 152 | 5.30E-03 | 0.04852 |
| GO:0009262                      | deoxyribonucleotide metabolic process                                                                                                                            | 2.83  | 19  | 4.40E-03 | 0.15715 |
| GO:1901988                      | negative regulation of cell cycle phase transition                                                                                                               | 1.234 | 105 | 3.30E-03 | 0.12959 |
| <b>Senescence and apoptosis</b> |                                                                                                                                                                  |       |     |          |         |
| REACT_169274                    | Cellular Senescence                                                                                                                                              | 1.205 | 81  | 1.45E-03 | 0.04092 |
| REACT_268456                    | Programmed Cell Death                                                                                                                                            | 1.075 | 118 | 8.30E-03 | 0.13396 |
| REACT_13648                     | Regulation of Apoptosis                                                                                                                                          | 1.679 | 42  | 1.37E-02 | 0.06883 |
| REACT_578                       | Apoptosis                                                                                                                                                        | 1.075 | 118 | 8.30E-03 | 0.13396 |
| <b>Tumor suppression</b>        |                                                                                                                                                                  |       |     |          |         |
| 137939_PID                      | Direct p53 effectors<br>Transcriptional Regulation by TP53; TP53                                                                                                 | 1.925 | 80  | 6.90E-03 | 0.05043 |
| REACT_355377                    | Regulates Metabolic Genes                                                                                                                                        | 1.901 | 52  | 1.70E-03 | 0.07427 |
| REACT_1625                      | p53-Dependent G1/S DNA damage checkpoint;                                                                                                                        | 1.544 | 50  | 7.10E-03 | 0.08427 |
| REACT_309                       | p53-Dependent G1 DNA Damage Response                                                                                                                             | 1.539 | 51  | 1.97E-02 | 0.08505 |
| GO:0072331                      | Stabilization of p53<br>signal transduction by p53 class mediator<br>intrinsic apoptotic signaling pathway by p53                                                | 1.378 | 88  | 1.50E-04 | 0.047   |
| GO:0072332                      | class mediator                                                                                                                                                   | 2.206 | 29  | 6.00E-03 | 0.09048 |
| 137957_PID                      | LKB1 (STK11) signaling events                                                                                                                                    | 2.814 | 26  | 1.40E-03 | 0.0585  |
| 169353_PID                      | Validated targets of C-MYC transcriptional repression                                                                                                            | 1.911 | 35  | 1.20E-03 | 0.07132 |

|                             |                                                  |       |     |          |         |
|-----------------------------|--------------------------------------------------|-------|-----|----------|---------|
| WP28                        | Selenium Metabolism and Selenoproteins           | 2.679 | 24  | 3.30E-03 | 0.08839 |
| REACT_12436                 | ERKs are inactivated                             | 2.714 | 10  | 4.98E-03 | 0.09532 |
| REACT_268323                | Hedgehog 'off' state                             | 1.528 | 62  | 7.10E-03 | 0.1257  |
| <b>Oncogenic pathways</b>   |                                                  |       |     |          |         |
| REACT_118778                | Activation of RAS                                | -3.07 | 4   | 4.21E-03 | 0.05877 |
| 138016__PID                 | ErbB receptor signaling network                  | -3.47 | 9   | 8.22E-03 | 0.07742 |
| 545371__BIOCYC              | MAP kinase cascade                               | -2.28 | 2   | 2.40E-03 | 0.08396 |
|                             | Ras activation uopn Ca2+ influx through NMDA     |       |     |          |         |
| REACT_20546                 | receptor                                         | -2.04 | 13  | 5.27E-03 | 0.08703 |
| REACT_121096                | EGFR Transactivation by Gastrin                  | -3.16 | 8   | 5.72E-03 | 0.0613  |
| <b>E-cadherin signaling</b> |                                                  |       |     |          |         |
|                             | E-cadherin signaling in the nascent adherens     |       |     |          |         |
| 138005__PID                 | junction                                         | 1.814 | 23  | 5.80E-03 | 0.08116 |
| 138002__PID                 | E-cadherin signaling in keratinocytes            | 2.395 | 11  | 7.30E-03 | 0.08155 |
| <b>Cell migration</b>       |                                                  |       |     |          |         |
| GO:0042074                  | cell migration involved in gastrulation          | -3.72 | 8   | 1.73E-03 | 0.08571 |
| GO:2001224                  | positive regulation of neuron migration          | -3.79 | 7   | 1.36E-03 | 0.0927  |
| <b>Metabolism</b>           |                                                  |       |     |          |         |
|                             | Respiratory electron transport, ATP synthesis by |       |     |          |         |
|                             | chemiosmotic coupling, and heat production by    |       |     |          |         |
|                             | uncoupling proteins.                             |       |     |          |         |
| REACT_6305                  |                                                  | 2.335 | 81  | 0        | 0       |
| REACT_71                    | Gene Expression                                  | 1.749 | 733 | 0        | 0       |
| REACT_17015                 | Metabolism of proteins                           | 1.194 | 486 | 0        | 0       |
|                             | The citric acid (TCA) cycle and respiratory      |       |     |          |         |
|                             | electron transport                               |       |     |          |         |
| REACT_111083                |                                                  | 2.047 | 109 | 0        | 0       |
| REACT_22393                 | Respiratory electron transport                   | 2.083 | 65  | 1.00E-04 | 0.01229 |
| WP623                       | Oxidative phosphorylation                        | 2.89  | 43  | 1.00E-04 | 0.01229 |
| REACT_1014                  | Translation                                      | 1.457 | 137 | 2.00E-04 | 0.01671 |
| REACT_125                   | Processing of Pre-mRNA                           | 1.737 | 104 | 2.00E-04 | 0.01671 |
| WP1785                      | DNA damage response and repair proteins          | 1.693 | 51  | 1.00E-02 | 0.04222 |
| WP1530                      | miRNA Regulation of DNA Damage Response          | 2.631 | 5   | 1.56E-03 | 0.0757  |
|                             | Base Excision Repair; Resolution of Abasic Sites |       |     |          |         |
| REACT_1893                  | (AP sites)                                       | 2.766 | 16  | 1.07E-03 | 0.08002 |
| KEGG_hsa03410               | Base excision repair                             | 2.406 | 17  | 2.55E-03 | 0.08252 |
| REACT_1826                  | Nucleotide Excision Repair                       | 1.782 | 31  | 4.40E-03 | 0.08441 |
|                             | Stabilization and expansion of the E-cadherin    |       |     |          |         |
|                             | adherens junction                                |       |     |          |         |
| 137918__PID                 |                                                  | 1.528 | 28  | 6.95E-03 | 0.08488 |
| REACT_216                   | DNA Repair                                       | 1.143 | 83  | 2.01E-02 | 0.08531 |
| REACT_383                   | DNA Replication                                  | 1.503 | 74  | 3.00E-03 | 0.08585 |
| REACT_169436                | Oxidative Stress Induced Senescence              | 1.356 | 51  | 5.92E-02 | 0.09123 |
| REACT_111119                | Antigen processing-Cross presentation            | 1.632 | 60  | 4.50E-03 | 0.10331 |
|                             |                                                  |       |     |          |         |
| REACT_163646                | SUMO is transferred from E1 to E2 (UBE2I, UBC9)  | 5.015 | 6   | 4.50E-03 | 0.10331 |
| REACT_163823                | SUMOylation                                      | 1.813 | 49  | 4.10E-03 | 0.10383 |
| REACT_6759                  | Formation of ATP by chemiosmotic coupling        | 3.279 | 14  | 5.00E-03 | 0.10872 |
|                             | Abortive elongation of HIV-1 transcript in the   |       |     |          |         |
|                             | absence of Tat                                   | 2.8   | 19  | 4.90E-03 | 0.10872 |
| REACT_264135                | Organelle biogenesis and maintenance             | 0.894 | 182 | 5.10E-03 | 0.10872 |
| KEGG_hsa04962               | Vasopressin-regulated water reabsorption         | 2.339 | 29  | 4.90E-03 | 0.10872 |

|               |                                                                         |       |      |          |         |
|---------------|-------------------------------------------------------------------------|-------|------|----------|---------|
| WP229         | Irinotecan Pathway                                                      | -4.91 | 6    | 5.10E-03 | 0.10872 |
| KEGG_hsa00230 | Purine metabolism                                                       | 1.234 | 99   | 4.80E-03 | 0.10872 |
| KEGG_M00158   | F-type ATPase, eukaryotes                                               | 3.279 | 14   | 5.00E-03 | 0.10872 |
| KEGG_hsa03010 | Ribosome                                                                | 1.208 | 114  | 4.20E-03 | 0.11796 |
| REACT_11123   | Membrane Trafficking                                                    | 1.169 | 121  | 4.30E-03 | 0.11839 |
| KEGG_hsa04380 | Osteoclast differentiation                                              | 1.453 | 66   | 6.00E-03 | 0.12053 |
| KEGG_M00340   | Proteasome, 20S core particle                                           | 3.134 | 15   | 6.00E-03 | 0.12053 |
| WP1001        | Peptide GPCRs                                                           | -7.18 | 2    | 5.90E-03 | 0.12053 |
| REACT_2243    | Assembly of the pre-replicative complex                                 | 1.638 | 55   | 6.20E-03 | 0.12105 |
| REACT_268156  | Degradation of GLI1 by the proteasome                                   | 1.79  | 47   | 6.20E-03 | 0.12105 |
|               | Degradation of beta-catenin by the destruction                          |       |      |          |         |
| REACT_11063   | complex                                                                 | 1.543 | 60   | 6.90E-03 | 0.12427 |
| REACT_15452   | Peptide hormone biosynthesis                                            | -7.13 | 2    | 6.90E-03 | 0.12427 |
| REACT_15398   | Glycoprotein hormones                                                   | -7.13 | 2    | 6.90E-03 | 0.12427 |
| 169346_PID    | Regulation of RAC1 activity                                             | 2.594 | 21   | 6.70E-03 | 0.12427 |
| KEGG_hsa03060 | Protein export                                                          | 2.672 | 19   | 6.70E-03 | 0.12427 |
| REACT_355474  | RHO GTPase Effectors                                                    | 0.99  | 148  | 7.10E-03 | 0.1257  |
| WP51          | Regulation of Actin Cytoskeleton                                        | 1.235 | 91   | 7.30E-03 | 0.12816 |
|               | Eukaryotic Translation Initiation; Cap-dependent                        |       |      |          |         |
| REACT_2099    | Translation Initiation                                                  | 1.135 | 107  | 7.50E-03 | 0.12949 |
| KEGG_hsa03008 | Ribosome biogenesis in eukaryotes                                       | 1.807 | 49   | 5.00E-03 | 0.12983 |
| REACT_355604  | Vesicle-mediated transport                                              | 1.009 | 140  | 7.70E-03 | 0.13036 |
| WP455         | GPCRs, Class A Rhodopsin-like                                           | -1.52 | 58   | 7.80E-03 | 0.13036 |
|               | Diseases associated with visual transduction;                           |       |      |          |         |
| REACT_160130  | Retinoid cycle disease events                                           | -7.09 | 2    | 7.80E-03 | 0.13036 |
| REACT_163725  | SUMO is proteolytically processed                                       | 5.13  | 5    | 7.70E-03 | 0.13036 |
| REACT_268133  | Mitochondrial translation elongation                                    | 1.578 | 54   | 8.10E-03 | 0.13396 |
| WP1539        | Angiogenesis                                                            | 3.227 | 13   | 8.40E-03 | 0.13396 |
| REACT_169208  | Glycogen synthesis                                                      | 3.429 | 11   | 8.40E-03 | 0.13396 |
| 138004_PID    | Alternative NF-kappaB pathway                                           | 4.548 | 4    | 8.50E-03 | 0.13453 |
| WP2035        | FSH signaling pathway                                                   | 2.769 | 17   | 8.90E-03 | 0.1398  |
| PWY-7224      | purine deoxyribonucleosides salvage                                     | 4.27  | 7    | 9.10E-03 | 0.14082 |
| HUMAN_PWY-53  | sulfate activation for sulfonation                                      | 3.904 | 2    | 9.60E-03 | 0.14533 |
| REACT_931     | Ribosomal scanning and start codon recognition                          | 1.575 | 52   | 1.06E-02 | 0.15002 |
| REACT_16973   | Orexin and neuropeptides FF and QRFP bind to their respective receptors | -4.14 | 3    | 1.03E-02 | 0.15002 |
| Transcription | GO module name                                                          |       |      |          |         |
| GO:0000398    | mRNA splicing, via spliceosome                                          | 1.752 | 152  | 0        | 0       |
| GO:0044237    | cellular metabolic process                                              | 0.301 | 4234 | 0        | 0       |
| GO:0048193    | Golgi vesicle transport                                                 | 1.252 | 155  | 0        | 0       |
| GO:0008104    | protein localization                                                    | 0.528 | 993  | 0        | 0       |
| GO:0033036    | macromolecule localization                                              | 0.559 | 1150 | 0        | 0       |
| GO:0010604    | macromolecule metabolism                                                | 0.433 | 1371 | 0        | 0       |
| GO:0009059    | macromolecule biosynthesis                                              | 0.387 | 1849 | 0        | 0       |
| GO:0044267    | cellular protein metabolic process                                      | 0.477 | 1876 | 0        | 0       |
| GO:0043484    | regulation of RNA splicing                                              | 1.983 | 59   | 9.00E-05 | 0.00024 |
| GO:0008380    | RNA splicing                                                            | 1.138 | 226  | 1.00E-04 | 0.01151 |
| GO:0006397    | mRNA processing                                                         | 1.131 | 255  | 1.00E-04 | 0.01151 |
| GO:0090304    | nucleic acid metabolic process                                          | 0.334 | 1959 | 1.00E-04 | 0.01151 |
| GO:0006974    | cellular response to DNA damage stimulus                                | 1.834 | 401  | 2.00E-04 | 0.0125  |

|            |                                                    |       |      |          |         |
|------------|----------------------------------------------------|-------|------|----------|---------|
| GO:0002449 | lymphocyte mediated immunity                       | -2.1  | 51   | 5.14E-04 | 0.0125  |
| GO:0055114 | oxidation-reduction process                        | 0.658 | 508  | 5.00E-04 | 0.03666 |
| GO:0009893 | positive regulation of metabolic process           | 0.3   | 1748 | 1.20E-03 | 0.06542 |
| GO:0002443 | leukocyte mediated immunity                        | -1.39 | 65   | 1.33E-03 | 0.08849 |
| GO:0019724 | B cell mediated immunity                           | -2.28 | 28   | 9.00E-04 | 0.09699 |
| GO:0051340 | regulation of ligase activity                      | 1.405 | 86   | 2.60E-03 | 0.1001  |
|            | negative regulation of protein modification by     |       |      |          |         |
| GO:1903321 | small protein conjugation or removal               | 1.378 | 90   | 2.60E-03 | 0.11048 |
| GO:0019941 | modification-dependent protein catabolic process   | 0.81  | 275  | 2.60E-03 | 0.11048 |
| GO:0051603 | proteolysis involved in cellular protein catabolic | 0.76  | 302  | 2.60E-03 | 0.11048 |
| GO:0065009 | regulation of molecular function                   | 0.326 | 1319 | 2.60E-03 | 0.11048 |
| GO:1903362 | regulation of cellular protein catabolic process   | 0.987 | 185  | 2.70E-03 | 0.11186 |
| GO:0043632 | process                                            | 0.772 | 281  | 2.70E-03 | 0.11186 |
| GO:0036211 | protein modification process                       | 0.335 | 1351 | 2.70E-03 | 0.11186 |
| GO:0006464 | cellular protein modification process              | 0.335 | 1351 | 2.70E-03 | 0.11186 |
| GO:0043603 | cellular amide metabolic process                   | 0.656 | 391  | 2.90E-03 | 0.11837 |
| GO:1901566 | organonitrogen compound biosynthetic process       | 0.524 | 590  | 2.90E-03 | 0.11837 |
| GO:0034504 | protein localization to nucleus                    | 1.322 | 90   | 3.10E-03 | 0.12469 |
| GO:0006612 | protein targeting to membrane                      | 1.067 | 145  | 3.10E-03 | 0.12469 |
|            | negative regulation of nucleobase-containing       |       |      |          |         |
| GO:0045934 | compound metabolic process                         | 0.488 | 646  | 3.10E-03 | 0.12469 |
| GO:0019229 | regulation of vasoconstriction                     | -2.57 | 26   | 3.20E-03 | 0.12748 |
| GO:0071806 | protein transmembrane transport                    | 2.425 | 30   | 3.20E-03 | 0.12748 |
| GO:0032224 | positive regulation of synaptic transmission,      | -7.64 | 2    | 3.30E-03 | 0.12959 |
| GO:0009394 | 2'-deoxyribonucleotide metabolic process           | 3.356 | 15   | 3.30E-03 | 0.12959 |
| GO:0044802 | single-organism membrane organization              | 0.585 | 435  | 3.40E-03 | 0.13227 |
| GO:0009892 | negative regulation of metabolic process           | 0.347 | 1234 | 3.40E-03 | 0.13227 |
| GO:0046850 | regulation of bone remodeling                      | -3.69 | 12   | 3.50E-03 | 0.13365 |
| GO:0006706 | steroid catabolic process                          | -3.68 | 13   | 3.50E-03 | 0.13365 |
| GO:0030163 | protein catabolic process                          | 0.691 | 333  | 3.60E-03 | 0.13621 |
| GO:0006451 | translational readthrough                          | 6.366 | 3    | 3.80E-03 | 0.1412  |
| GO:0001514 | selenocysteine incorporation                       | 6.366 | 3    | 3.80E-03 | 0.1412  |
|            | positive regulation of protein modification by     |       |      |          |         |
| GO:1903322 | small protein conjugation or removal               | 1.184 | 112  | 3.90E-03 | 0.14427 |
| GO:0070194 | synaptonemal complex disassembly                   | 6.918 | 2    | 4.10E-03 | 0.15032 |
| GO:0045110 | intermediate filament bundle assembly              | -6.05 | 4    | 4.30E-03 | 0.15424 |
| GO:0010875 | positive regulation of cholesterol efflux          | -4.58 | 7    | 4.30E-03 | 0.15424 |

F\_D\* Log2 of average fold difference for genes involved in a pathway in SHS survived vs untreated eMSC  
N<sub>g</sub>\*\* Gene number in a pathway

Supplementary Table 2. Comparison of gene expression changes in SHS survived vs untreated eMSC (present study) and in hTERT transformed vs intact bone marrow MSC (\*the data from Takeuchi et al, 2015)

Genes that changed expression in the same direction in hTERT-transformed and SHS-survived eMSC cells ( the 22 gene list)

| Gene symbol | Gene annotation                                                        | **F_D in eMSC | ***F_D in bmMSC |
|-------------|------------------------------------------------------------------------|---------------|-----------------|
| ATAD2       | ATPase family, AAA domain containing 2                                 | 2.693744962   | 4.82            |
| PIK3CA      | phosphatidylinositol-4,5-bisphosphate 3-kinase catalytic subunit alpha | 5.637177442   | 1.95            |
| DAB2IP      | DAB2 interacting protein                                               | -5.911036602  | -3.28           |
| PRKDC       | protein kinase, DNA-activated, catalytic polypeptide                   | 0.815980235   | 4.3             |
| XRCC5       | X-ray repair complementing defective repair in Chinese hamster cells 5 | 1.66511122    | 3.4             |
| FRY         | FRY microtubule binding protein                                        | -6.992232987  | 3.87            |
| MARCKSL1    | MARCKS-like 1                                                          | -3.5547421    | -2.1            |
| PTTG1       | pituitary tumor-transforming 1                                         | 3.701774085   | 3.59            |
| RAD21       | RAD21 cohesin complex component                                        | 4.271614407   | 1.97            |
| CCNB1       | cyclin B1                                                              | 5.898624955   | 1.31            |
| CDK4        | cyclin-dependent kinase 4                                              | 2.709958339   | 1.5             |
| CIZ1        | 1                                                                      | 7.944973164   | 4.51            |
| E2F1        | E2F transcription factor 1                                             | 5.637177442   | 2               |
| XAF1        | XIAP associated factor 1                                               | -1.80147703   | -10.5           |
| IGF1R       | insulin like growth factor 1 receptor                                  | 5.150563358   | 3.26            |
| IGF2BP2     | insulin like growth factor 2 mRNA binding protein 2                    | 6.381244889   | 2.1             |
| PDGFB       | platelet-derived growth factor beta polypeptide                        | 5.447669658   | 6.2             |
| MSX2        | msh homeobox 2                                                         | -6.766634504  | 10.1            |
| FLT1        | fms-related tyrosine kinase 1                                          | 2.887719472   | 2.6             |
| PDGFB       | platelet-derived growth factor beta polypeptide                        | 5.447669658   | 6.2             |
| MTA1        | metastasis associated 1                                                | -4.114305969  | -3.21           |
| SOX4        | SRY-box 4                                                              | -5.97747568   | -2.24           |

Genes that changed expression in opposite direction in hTERT-transformed and SHS-survived eMSC cells ( the 45 gene list)

| Gene symbol | Gene annotation                                          | **F_D in eMSC | ***F_D in bmMSC |
|-------------|----------------------------------------------------------|---------------|-----------------|
| RAI2        | transferrin receptor (CD71)                              | -0.84562321   | 42.5            |
| MYBL2       | v-myb avian myeloblastosis viral oncogene homolog-like 2 | -1.303399719  | 4               |

|         |                                                                |              |       |
|---------|----------------------------------------------------------------|--------------|-------|
|         | related RAS viral (r-ras) oncogene                             |              |       |
| RRAS2   | homolog 2                                                      | 5.447669658  | -3.2  |
| HIC1    | hypermethylated in cancer 1                                    | 1.369160022  | -3.2  |
| RASA4   | RAS p21 protein activator 4                                    | 4.243219397  | -8    |
| BRCA1   | breast cancer 1                                                | -1.914790568 | 3.8   |
| RAD9A   | RAD9 checkpoint clamp component A                              | -3.882713009 | 3.1   |
| TREX1   | three prime repair exonuclease 1                               | 0.673443916  | -3.5  |
| CENPE   | centromere protein B                                           | -0.996819457 | 2.7   |
| CCND2   | cyclin D2                                                      | -6.833889492 | 2.9   |
| BCL2L11 | BCL2-like 11 (apoptosis facilitator)                           | -6.248087035 | 2     |
| BCL2L12 | BCL2-like 12 (proline rich)                                    | -6.294098098 | 2.3   |
| CASP10  | caspase 10                                                     | 5.532679563  | -7.4  |
| APC     | adenomatous polyposis coli                                     | -5.540096982 | 2.5   |
| CTNNB1  | catenin beta 1                                                 | 1.526349958  | -1.6  |
| DKK3    | dickkopf WNT signaling pathway inhibitor 3                     | -0.770549326 | 2.25  |
| WNT5A   | wingless-type MMTV integration site family member 5A           | 2.056581454  | -8.47 |
| CSF2    | colony stimulating factor 2 (granulocyte-macrophage)           | -6.854057627 | 2.3   |
| EIF4B   | eukaryotic translation initiation factor 4B                    | -0.219956085 | 5.9   |
| F2RL1   | coagulation factor II (thrombin) receptor                      | -0.166800347 | 4.8   |
| TFRC    | transferrin receptor                                           | -5.846085596 | 3.8   |
| ACTA2   | actin, alpha 2, smooth muscle, aorta                           | 1.904361494  | -8.4  |
| HMGA2   | high mobility group AT-hook 2                                  | -4.429339353 | 3.06  |
| POSTN   | periostin, osteoblast specific factor                          | 3.565235757  | -14.3 |
| TAGLN   | transgelin                                                     | 1.811100282  | -7.5  |
| THY1    | Thy-1 cell surface antigen                                     | 0.009548314  | -5.9  |
| CDH2    | cadherin 2, type 1, N-cadherin (neuronal)                      | -0.524072578 | 1.96  |
| COL4A5  | collagen, type IV, alpha 5                                     | -5.569748468 | 38.2  |
| FN1     | fibronectin 1                                                  | 0.921282332  | -8.4  |
| ICAM1   | intercellular adhesion molecule 1                              | 0.837115163  | -6.4  |
| ITGA6   | integrin subunit alpha 6                                       | -1.062067995 | 2.65  |
| MCAM    | melanoma cell adhesion molecule                                | -5.729456131 | -10.6 |
| VCAN    | versican                                                       | 3.644240224  | -7.3  |
| FBN2    | fibrillin 2                                                    | -0.101800749 | 4.19  |
| FGF2    | fibroblast growth factor 2 (basic)                             | 5.839729038  | -3.1  |
| NRP1    | neuropilin 1                                                   | -1.506849222 | -1.52 |
| THBS1   | thrombospondin 1                                               | 1.284946107  | -8.24 |
| VEGFC   | vascular endothelial growth factor C                           | 3.339996507  | -4.2  |
| MMP14   | matrix metalloproteinase 14                                    | 1.825987452  | -4.6  |
| MMP3    | matrix metalloproteinase 3                                     | 1.623256589  | 35    |
| TIMP1   | TIMP metalloproteinase inhibitor 1                             | 1.225146379  | -4.2  |
| CDH1    | E-cadherin                                                     | 2.456987546  | -1.48 |
| CDKN2B  | cyclin D-dependent kinase (CDK4 or CDK6) inhibitor, p14 or p15 | 4.285698345  | -25.2 |

|       |                         |             |       |
|-------|-------------------------|-------------|-------|
| ELN   | elastin                 | 2.136954245 | -14.8 |
| MTSS1 | metastasis suppressor 1 | 1.338877562 | -5.1  |

Genes that are expressed in hTERT transformed and untreated bm MSC and are silent genes in SHS survived and control eMSC ( the 44 gene list)

| Gene symbol | Gene annotation                                                     | **F_D in eMSC | ***F_D in bmMSC |
|-------------|---------------------------------------------------------------------|---------------|-----------------|
| BMI1        | polycomb group ring finger protein                                  | No_Expression | 4.3             |
| RHEB        | Ras homolog, small GTPase protein                                   | No_Expression | 1.16            |
| RHEBL1      | Ras homolog                                                         | No_Expression | 1.26            |
| DBC1        | inhibit SIRT1 function                                              | No_Expression | -7.6            |
| PYHIN1      | pyrin and HIN domain family                                         | No_Expression | 2.7             |
| RAP1GAP     | GTPase activator for Ras-related protein (RAP1A)                    | No_Expression | -9.4            |
| RB1CC1      | enhance RB1 gene expression                                         | No_Expression | 2.39            |
| SFN         | stratifin, stabilize p53                                            | No_Expression | -2.8            |
| TP63        | p53 family                                                          | No_Expression | -3.1            |
| MDC         | mediator of DNA-damage checkpoint maintain chromosome stability and | No_Expression | 3.95            |
| XRCC3       | repair DNA damage in HR                                             | No_Expression | -2.6            |
| CENPB       | centromere-associated protei                                        | No_Expression | -2.04           |
| CETN3       | centrin                                                             | No_Expression | 3.03            |
| ESPL1       | separate, sister chromatid separation                               | No_Expression | 2.75            |
| MAD2L1      | mitotic spindle assembly check point                                | No_Expression | 6.45            |
| RFC4        | elongation of primed DNA templates by DNA polymerase delta          | No_Expression | 3.17            |
| STAG2       | a component of cohesin                                              | No_Expression | 3.68            |
| CCNE2       | G1/S specific cyclin E                                              | No_Expression | 2.59            |
| CDK2        | cyclin-dependent protein kinase for late G1 phase                   | No_Expression | 1.78            |
| CDKN1C      | G1 cyclin-dependent kinase inhibitor, p57                           | No_Expression | -1.4            |
| CDKN2AIPN   | CDKN2A(p16)-interacting protein                                     | No_Expression | 2.5             |
| BCL2        | suppress apoptosis                                                  | No_Expression | 2.05            |
| HRK         | harakiri, BCL2 interacting protein                                  | No_Expression | -10.2           |
| TNFRSF11B   | Fas-like protein                                                    | No_Expression | -2.14           |
| TNFRSF6B    | tumor necrosis factor receptor, suppress cell death                 | No_Expression | 4.5             |
| DHH         | desert hedgehog, activates stromal hedgehog effectors               | No_Expression | 3.44            |
| FZD1        | Wnt protein receptor; frizzled 1                                    | No_Expression | -3.2            |
| GLI1        | transcriptional activator                                           | No_Expression | 1.41            |
| HHIP        | hedgehog interacting protein, negative regulators                   | No_Expression | -2.08           |
| PTCH1       | receptor for hedgehog protein (Dhh, Shh, Ihh)                       | No_Expression | 1.98            |

|         |                                                                                |               |       |
|---------|--------------------------------------------------------------------------------|---------------|-------|
| FGF14   | fibroblast growth factor 14                                                    | No_Expression | 5.1   |
| NCBP2   | nuclear cap binding protein                                                    | No_Expression | 5.41  |
| RAI2    | transferrin receptor (CD71)                                                    | No_Expression | 42.1  |
| GPC5    | glypican 5                                                                     | No_Expression | 135   |
| LMOD1   | smooth muscle leiomodin 1                                                      | No_Expression | -10.4 |
| COL15A1 | collagen, type XV, alpha 1                                                     | No_Expression | -0.76 |
| ANGPT1  | angiopoietin 1, important roles in vascular development                        | No_Expression | -4.1  |
| F2RL1   | fibrillin                                                                      | No_Expression | 4.76  |
| KDR     | type III receptor tyrosine kinase, receptors of the VEGF                       | No_Expression | 2.95  |
| CTSF    | cathepsin F, lysosomal protease, implication in tumour invasion and metastasis | No_Expression | 1.894 |
| CTSH    | cathepsin H, degradation of lysosomal protein                                  | No_Expression | 3.918 |
| mmp1    | matrix metalloproteinase 1                                                     | No_Expression | -8.29 |
| mmp2    | matrix metalloproteinase 2                                                     | No_Expression | -2.63 |
| TIMP4   | TIMP metalloproteinase inhibitor 4                                             | No_Expression | -3.21 |

\* The data for mostly deregulated genes in hTERT transformed vs intact bm MSC were taken from Takeuchi, et al, 2015 for comparison

Reference: Takeuchi M, Higashino A, Takeuchi K, Hori Y, Koshiba-Takeuchi K, Makino H, Monobe Y, Kishida M, Adachi J, Takeuchi J, Tomonaga T, Umezawa A, Kameoka Y, Akagi K. Transcriptional Dynamics of Immortalized Human Mesenchymal Stem Cells during Transformation. PLoS One. 2015. 2015 15;10(5):e0126562. doi: 10.1371/journal.pone.0126562. eCollection

\*\* Expression fold difference (Log<sub>2</sub>) in SHS survived eMSC vs control eMSC

\*\*\* Expression fold difference in hTERT transformed compared to intact bmMSC at the fourth (last) stage of transformation



**Supplementary Table 3.**

**Comparison of gene module activity enriching for 22, 45 and 44 gene sets in hTERT and SHS treated bmMSC and eMSC.**

| <b>Pathway ID</b>                                                                                                                                                                    | <b>Pathway description</b>        | <b>Count in gene set</b> | <b>false discovery rate</b> | <b>Fold_1 hTERT transformed vs intact bm MSC</b> | <b>Fold_2 SHS survived vs intact eMSC</b> |
|--------------------------------------------------------------------------------------------------------------------------------------------------------------------------------------|-----------------------------------|--------------------------|-----------------------------|--------------------------------------------------|-------------------------------------------|
| <b>Gene module enriching for genes that are expressed in hTERT transformed and control bmMSC and that are silent in control and experimental eMSC (60 genes)</b>                     |                                   |                          |                             |                                                  |                                           |
| GO:0002009                                                                                                                                                                           | Morphogenesis of an epithelium    | 11                       | 7.20E-05                    | 1.87±0.7                                         | 0                                         |
| KEGG:04110                                                                                                                                                                           | Cell cycle                        | 10                       | 1.47E-08                    | 1.41±0.6                                         | 0                                         |
| KEGG:05200                                                                                                                                                                           | Pathways in cancer                | 12                       | 2.20E-08                    | 1.64±0.5                                         | 0                                         |
| KEGG:05205                                                                                                                                                                           | Proteoglycans in cancer           | 10                       | 9.25E-07                    | 1.52±0.4                                         | 0                                         |
| <b>Gene module enriching for genes that changed expression in the same direction in experiment vs control cells in hTERT transformed bmMSC and in SHS survived eMSC (21 genes)</b>   |                                   |                          |                             |                                                  |                                           |
| GO:0010564                                                                                                                                                                           | Regulation of cell cycle process  | 11                       | 1.7E-05                     | 0.34±0.2                                         | 0.28±0.2                                  |
| GO:1901701                                                                                                                                                                           | Cellular response to oxygen-      | 10                       | 3.20E-05                    | 0.39±0.1                                         | 0.31±0.2                                  |
| <b>Gene module enrichment for genes that changed expression in opposite directions in experiment vs control cells in hTERT transformed bmMSC and in SHS survived eMSC (42 genes)</b> |                                   |                          |                             |                                                  |                                           |
| GO:0030154                                                                                                                                                                           | Cell differentiation              | 16                       | 3.19E-04                    | -1.78±0.3                                        | 0.46±0.2                                  |
| GO:0030198                                                                                                                                                                           | Extracellular matrix organization | 11                       | 4.99E-08                    | -1.4±0.5                                         | 0.7±0.2                                   |
| GO:0040011                                                                                                                                                                           | Locomotion                        | 15                       | 3.50E-07                    | -1.6±0.3                                         | 1.5±0.3                                   |
| GO:0030155                                                                                                                                                                           | Regulation of cell adhesion       | 10                       | 1.20E-05                    | -2.3±1.8                                         | 0.68±0.2                                  |
| GO:0045597                                                                                                                                                                           | Positive regulation of cell       | 10                       | 1.20E-04                    | -1.27±1.8                                        | 0.53±1.8                                  |
| KEGG:04151                                                                                                                                                                           | PI3K-Akt signaling pathway        | 13                       | 5.40E-12                    | 1.83±0.2                                         | -1.21±0.3                                 |
| KEGG:04510                                                                                                                                                                           | Focal adhesion                    | 7                        | 6.69E-05                    | 1.82±0.2                                         | -1.34±0.3                                 |
